# Supplementary material for: Suppression of SREBP-1 Expression by Simvastatin Decreases Visfatin-Induced Chemoresistance to Sunitinib in Human Renal Carcinoma 786-O Cells
Source: MDPI journal article supplement (doi:10.3390/life12111890), 2022-11-15

Figure S1. Original, representative blots corresponding to Figures in this study.

Figure 1C

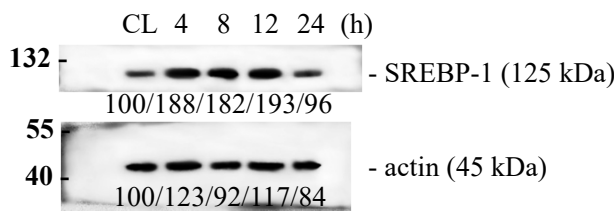

Figure 3B

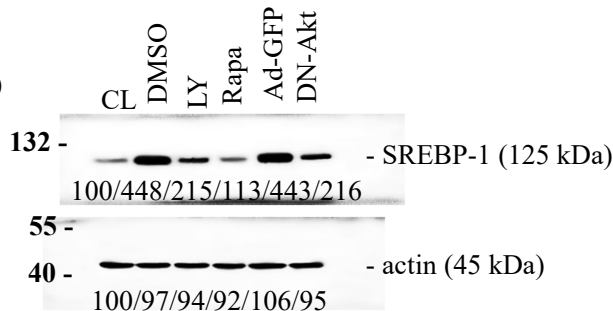

Figure 1D

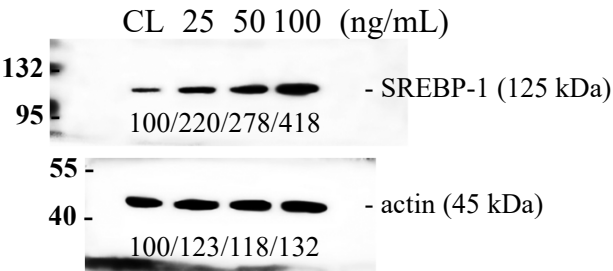

Figure 3D

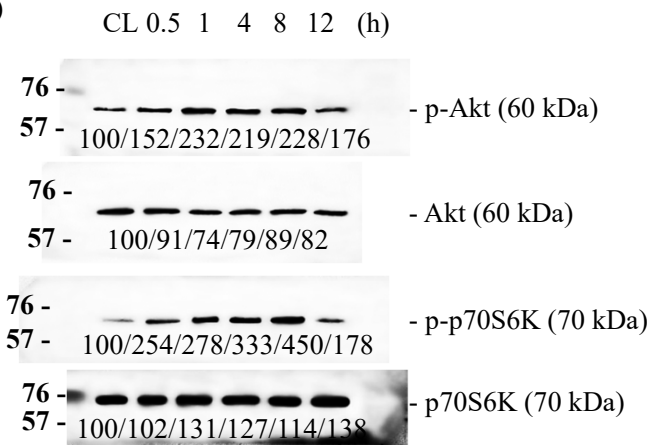

Figure 4C

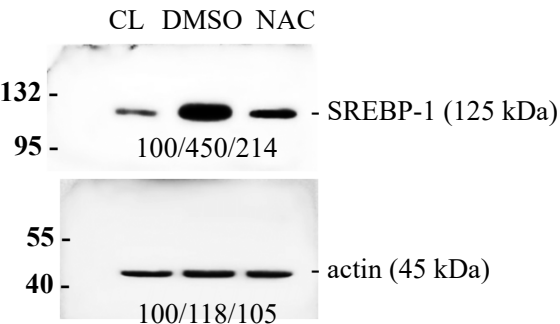

Figure 5D

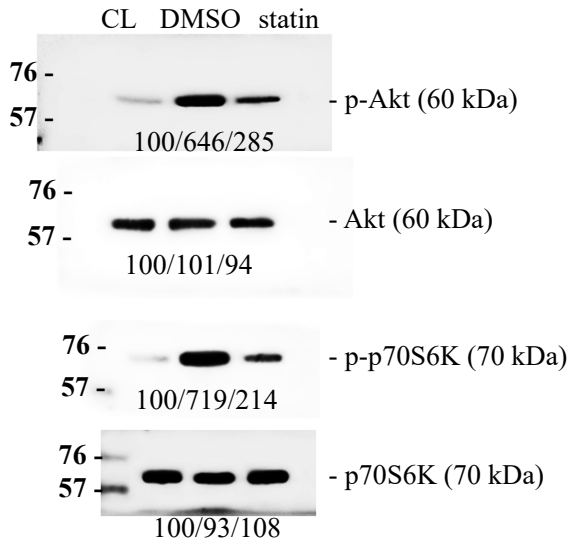

Figure 5C

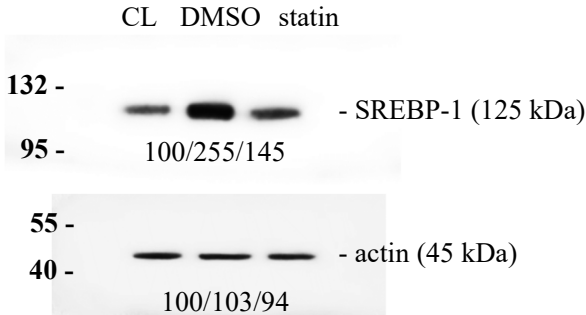

Supplement: s1 [file s1]
